# Supplementary material for: Sequential double chemical activation of biochar enables the fast and high-capacity capture of tetracycline
Source: Royal Society of Chemistry journal article supplement (doi:10.1039/d4qm00381k), 2024-01-01
Supplement: d4qm00381k1.pdf [file d4qm00381k1.pdf]

## Electronic Supporting Information (ESI)

### **Sequential double chemical activation of biochar enables the fast and high-capacity capture of tetracycline**

*Yuyuan Zhang,<sup>a</sup> Zhantu Zhang,<sup>a</sup> Jiayin Zheng,<sup>a</sup> Ruhui Peng,<sup>a</sup> Menglei Chang,<sup>a</sup> Fei Hu,<sup>a</sup>*

*Yazhuo Wang,<sup>c</sup> Huawen Hu<sup>\*a</sup> and Jian Zhen Ou<sup>\*b</sup>*

*\* Corresponding author. E-mails: [huawenhu@126.com](mailto:huawenhu@126.com); [Jianzhen.ou@rmit.edu.au](mailto:Jianzhen.ou@rmit.edu.au)*

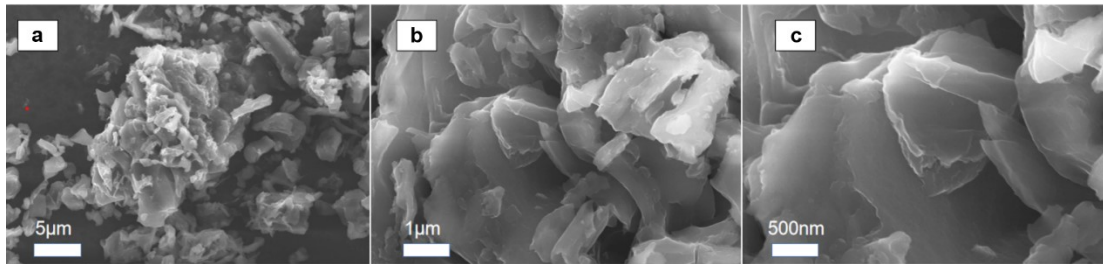

**Figure S1.** a-c) SEM images (at different magnification scales) of the BCM1 sample prepared by the one-step pyrolysis of dead-leaf biomass and melamine.

**Table S1.** Production rates calculated for the BC-K, BCM0.5-K, BCM1-K, and BCM2-K samples.

| Sample   | Biomass powder weight<br>(g) | Biochar product weight<br>(g) | Production rate<br>(%) |
|----------|------------------------------|-------------------------------|------------------------|
| BC-K     | 3                            | 0.63                          | 21.14                  |
| BCM0.5-K | 3                            | 0.85                          | 28.50                  |
| BCM1-K   | 3                            | 0.48                          | 16.00                  |
| BCM2-K   | 3                            | 0.52                          | 17.36                  |

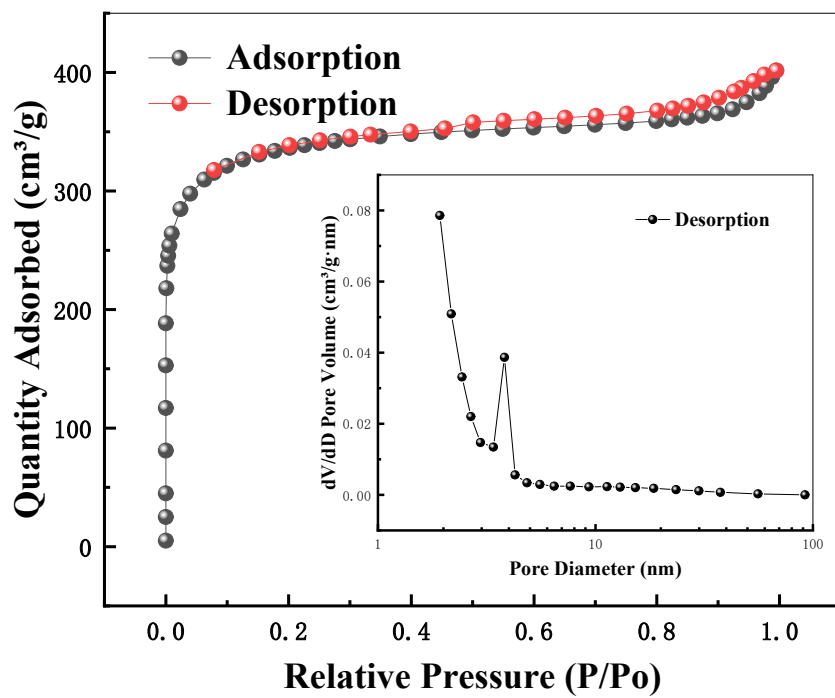

**Figure S2.** N<sub>2</sub> adsorption-desorption isotherm for the BC-K sample. Inset presents the corresponding pore diameter distribution plot.

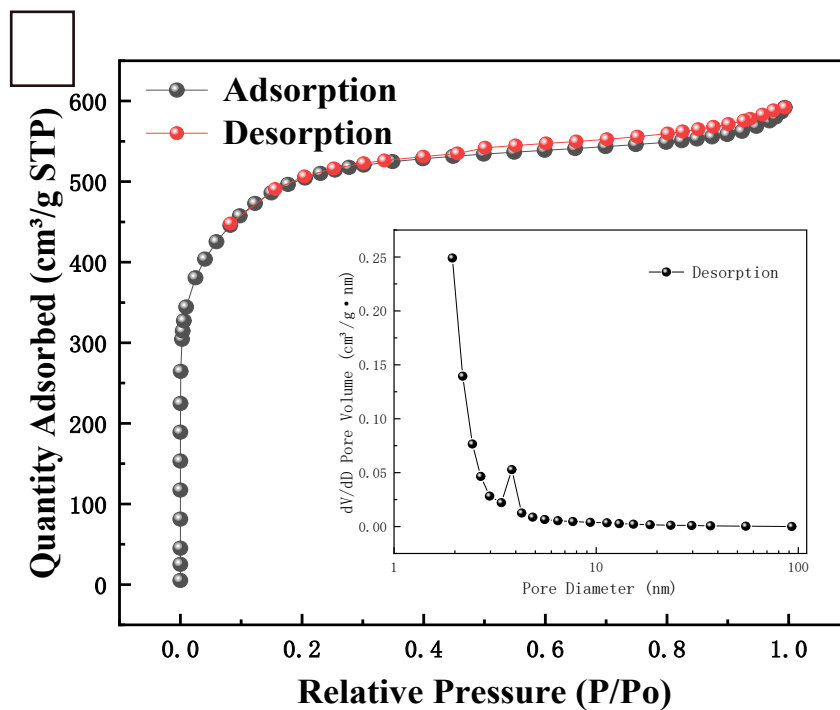

**Figure S3.** N<sub>2</sub> adsorption-desorption isotherm for the BCM0.5-K sample. Inset presents the corresponding pore diameter distribution plot.

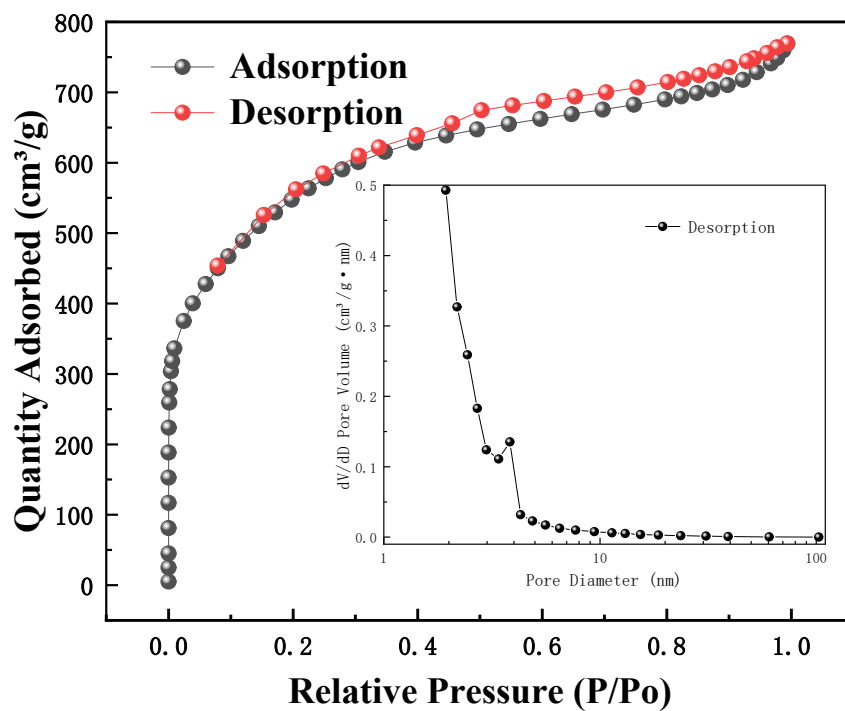

**Figure S4.** N<sub>2</sub> adsorption-desorption isotherm for the BCM1-K sample. Inset presents the corresponding pore diameter distribution plot.

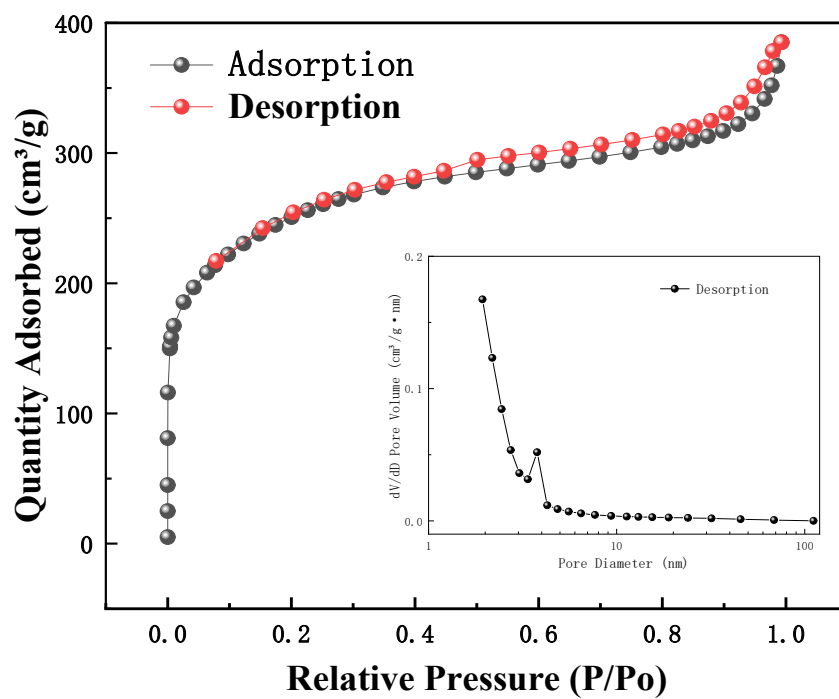

**Figure S5.** N<sub>2</sub> adsorption-desorption isotherm for the BCM2-K sample. Inset presents the corresponding pore diameter distribution plot.

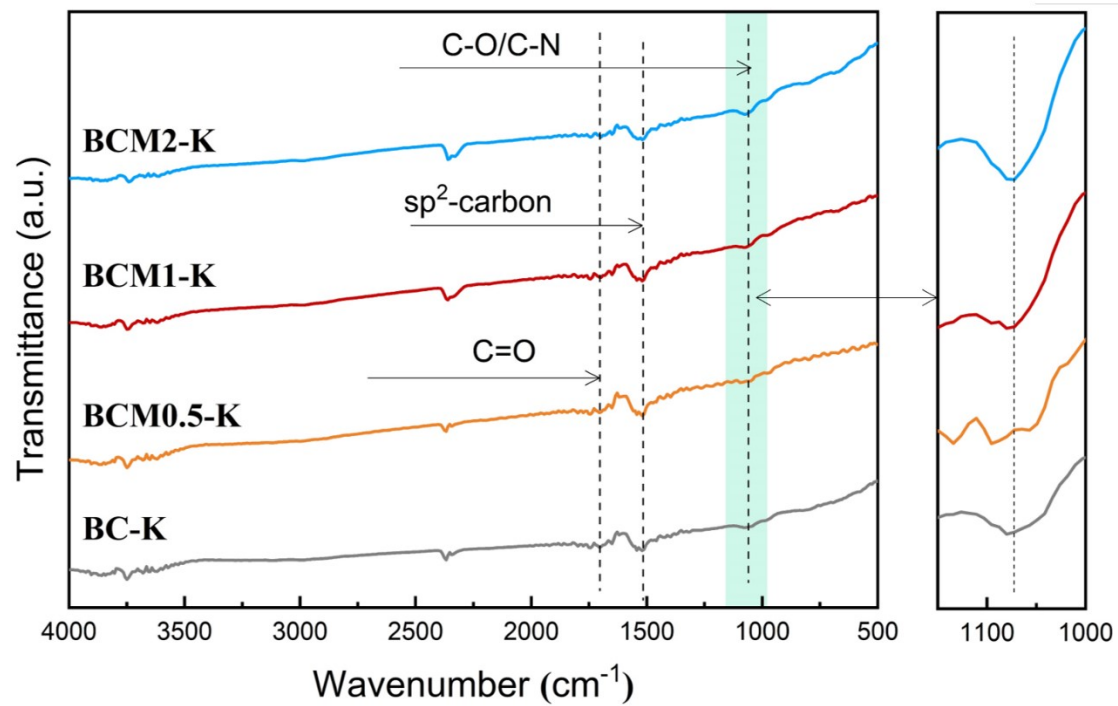

**Figure S6.** FTIR spectra of the BC-K, BCM0.5-K, BCM1-K, and BCM2-K samples.

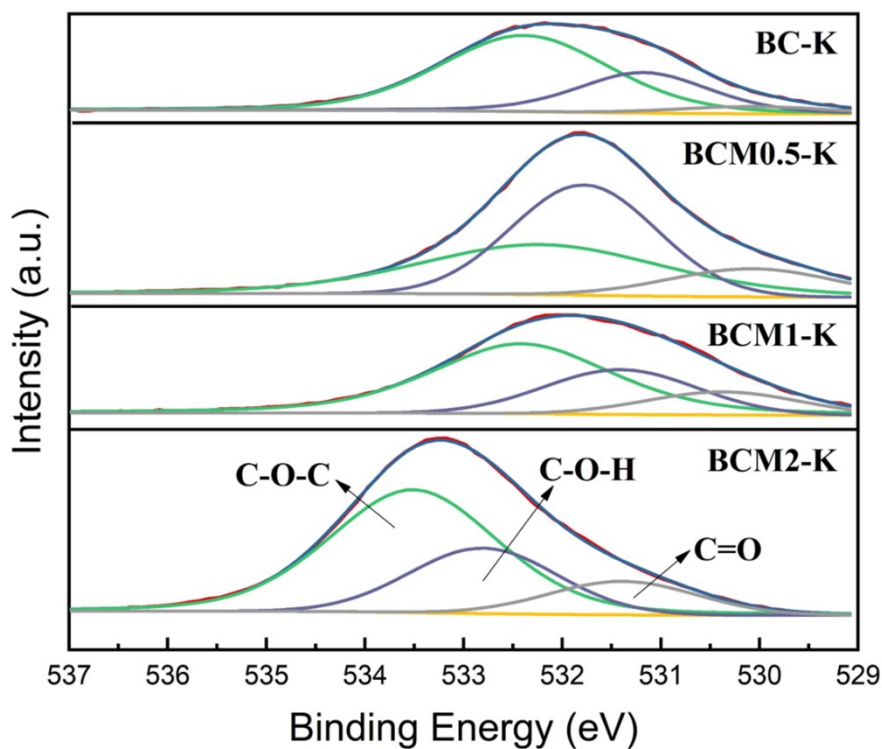

**Figure S7.** High-resolution XPS O1s spectra of the BC-K, BCM0.5-K, BCM1-K, and BCM2-K samples.

**Table S2.** Summary of the oxygen-containing functional group percentages calculated based on the high-resolution XPS O1s spectra shown in Figure S3.

| Sample   | Percentage of different O-containing functional groups (at.%) |       |       |
|----------|---------------------------------------------------------------|-------|-------|
|          | C=O                                                           | C-O-H | C-O-C |
| BC-K     | 5.04                                                          | 28.49 | 66.29 |
| BCM0.5-K | 13.57                                                         | 40.27 | 46.16 |
| BCM1-K   | 13.95                                                         | 26.81 | 59.24 |
| BCM2-K   | 13.27                                                         | 25.70 | 61.03 |



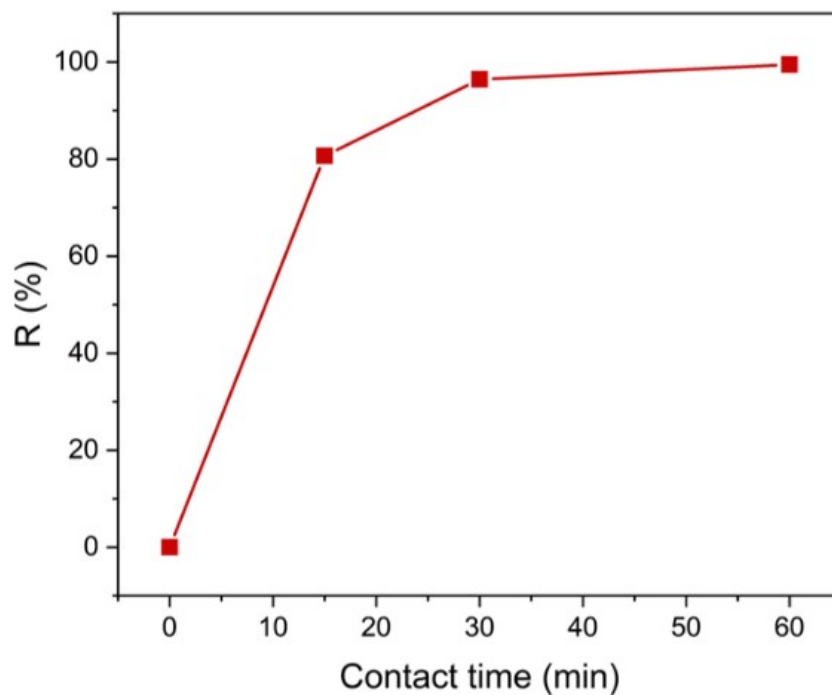

**Figure S8.** Investigation of contact time impact on the adsorption performance of the optimal sample (in this case, BCM1-K).

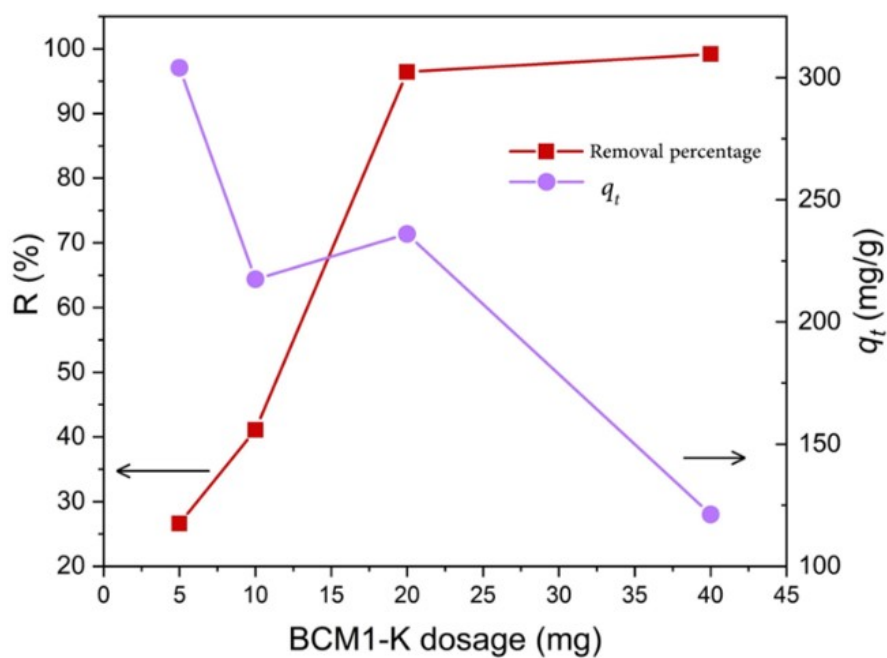

**Figure S9.** Investigation of BCM1-K adsorbent dosage on its adsorption performance.

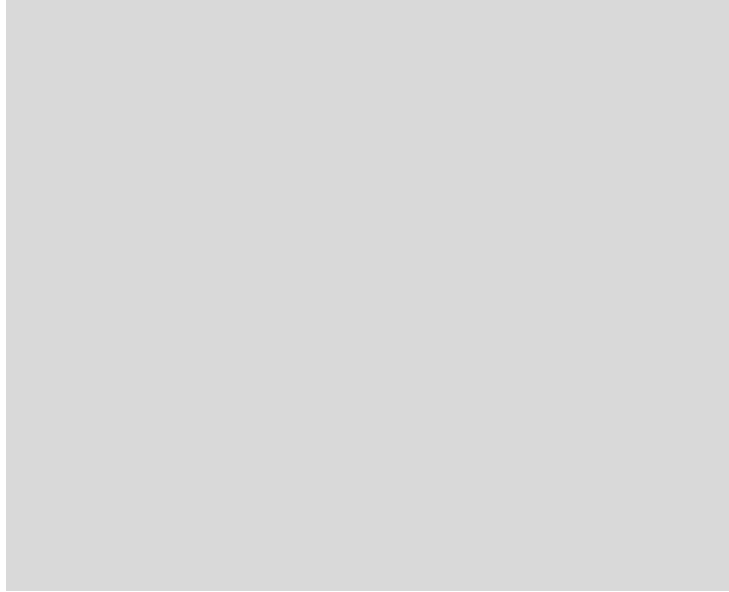

**Figure S10.** Investigation of initial TC concentration on the adsorption performance of the optimal sample (in this case, BCM1-K).

**Table S3.** Comparison of the  $q_{max}$  of TC capture obtained for the optimal sample (i.e., BCM1-K) in this study with those in recent literature.

| <b>Adsorbent</b>                                                    | <b>Temperature<br/>(°C)</b> | <b>pH</b> | <b><math>q_{max}</math><br/>(mg/g)</b> | <b>Ref.</b>      |
|---------------------------------------------------------------------|-----------------------------|-----------|----------------------------------------|------------------|
| <b>BCM1-K</b>                                                       | <b>25</b>                   | <b>7</b>  | <b>433.74</b>                          | <b>This work</b> |
| Magnetic chitosan                                                   | 20                          | 7         | 211.21                                 | [1]              |
| Fe <sub>3</sub> O <sub>4</sub> NPs                                  | 29                          | 7         | 19.6                                   | [2]              |
| RGO                                                                 | 25                          | 7         | 44.23                                  | [3]              |
| $\alpha$ -Fe <sub>2</sub> O <sub>3</sub> /RGO                       | 25                          | 4         | 18.47                                  | [3]              |
| Halloysite/chitosan<br>nanocomposite                                | 25                          | 8.5       | 15.6                                   | [4]              |
| Tricaprylmethylammonium<br>chloride-conjugated chitosan<br>hydrogel | 45                          | 7         | 22.42                                  | [5]              |
| Copper/cobalt<br>ferrite@chitosan                                   | 25                          | 3.5       | 4.48                                   | [6]              |

|                                                        |    |   |        |      |
|--------------------------------------------------------|----|---|--------|------|
| Rice husk ash                                          | 40 | 5 | 8.37   | [7]  |
| Biochar with micropores<br>widened by GO               | 40 | 7 | 336.70 | [8]  |
| Biochar co-activated by<br>MnCl <sub>2</sub> /KOH      | 25 | 7 | 295.98 | [9]  |
| AC                                                     | 25 | 7 | 25.28  | [10] |
| AC/Fe <sub>3</sub> O <sub>4</sub> /ZIF-8               | 25 | 7 | 57.47  | [10] |
| Chitin/calcite composite<br>extracted from shell waste | 25 | 6 | 150.76 | [11] |

Note: GO, graphene oxide; RGO, reduced graphene oxide; NPs, nanoparticles; activated carbon, AC; zeolitic imidazolate framework, ZIF-8.

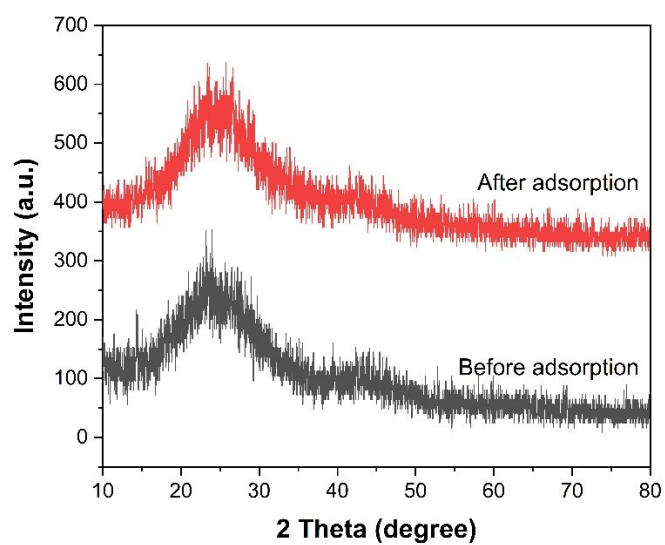

**Figure 11.** XRD patterns of the BCM1-K sample.

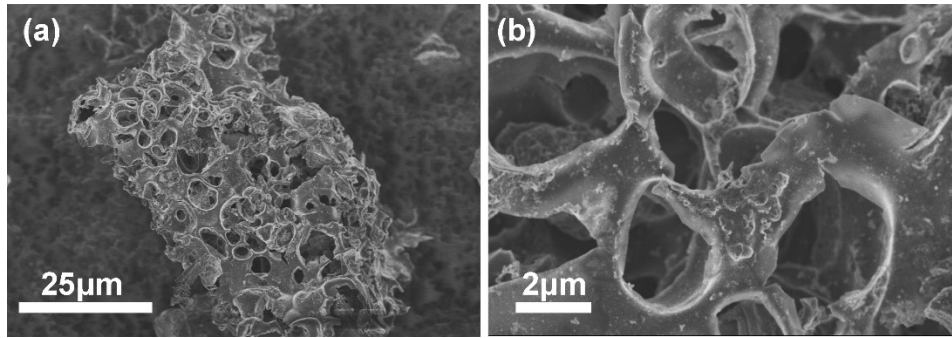

**Figure 12.** a,b) The morphology of the recycled BCM1-K sample. (a) and (b) are the SEM images at different magnification scales.

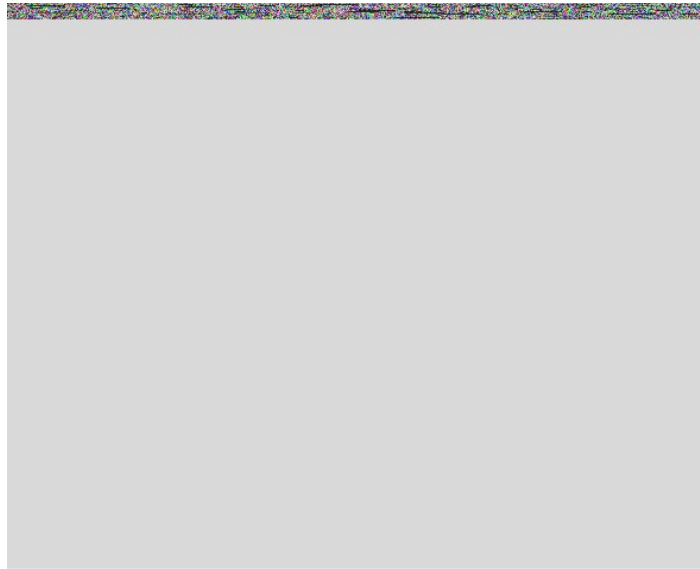

**Figure S13.** Investigation of TC solution pH on the adsorption performance of the optimal sample (in this case, BCM1-K).

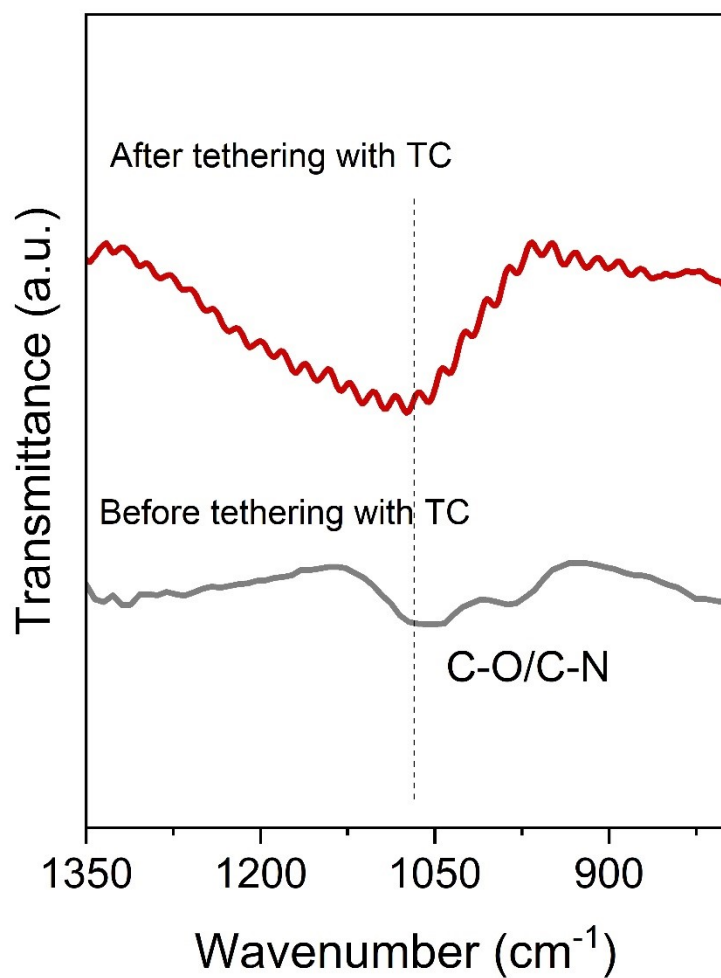

**Figure S14.** FTIR spectra of the BCM1-K sample before and after tethering with TC molecules.

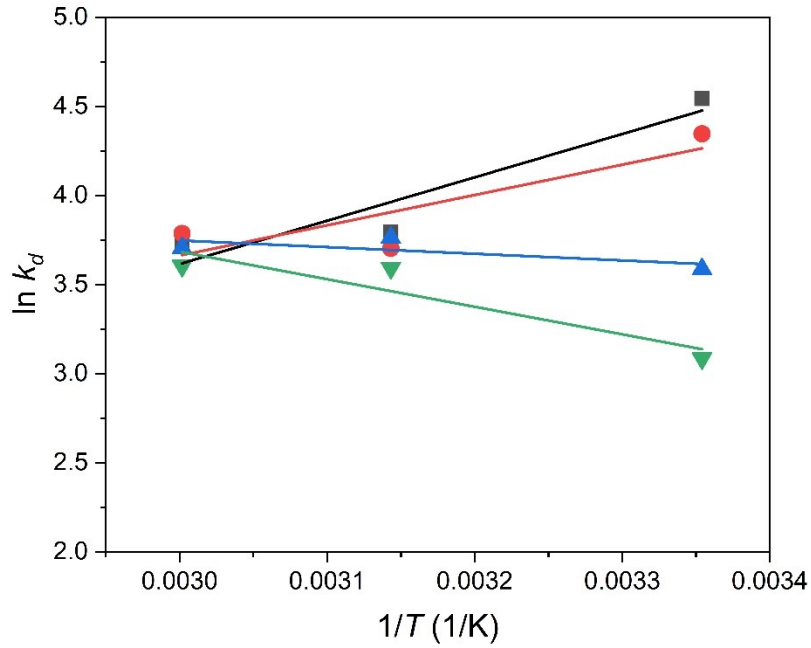

**Figure S15.** Van't Hoff plots of  $\ln k_d$  as a function of  $1/T$  for the adsorption system with BCM1-K.

**Table S4.** Summary of the thermodynamic parameters obtained via the studies of the temperature impact on the equilibrium adsorption capacities.

| TC<br>concentration<br>(mg/L) | Thermodynamic parameters   |            |            |                            |            |            |                             |            |            |
|-------------------------------|----------------------------|------------|------------|----------------------------|------------|------------|-----------------------------|------------|------------|
|                               | $\Delta G^\theta$ (kJ/mol) |            |            | $\Delta H^\theta$ (kJ/mol) |            |            | $\Delta S^\theta$ (J/mol K) |            |            |
|                               | 25<br>(°C)                 | 45<br>(°C) | 60<br>(°C) | 25<br>(°C)                 | 45<br>(°C) | 60<br>(°C) | 25<br>(°C)                  | 45<br>(°C) | 60<br>(°C) |
| 50                            | -11.26                     | -10.04     | -10.30     |                            | -20.22     |            |                             | -30.60     |            |
| 60                            | -10.77                     | -9.80      | -10.49     |                            | -14.13     |            |                             | -11.94     |            |
| 70                            | -8.89                      | -9.96      | -10.26     |                            | 3.11       |            |                             | 40.48      |            |
| 80                            | -7.65                      | -9.50      | -9.99      |                            | 12.85      |            |                             | 69.19      |            |

## References

- [1] da Silva Bruckmann, F.; Schnorr, C. E.; da Rosa Salles, T.; Nunes, F. B.; Baumann, L.; Müller, E. I.; Silva, L. F. O.; Dotto, G. L.; Bohn Rhoden, C. R., Highly efficient adsorption of tetracycline using chitosan-based magnetic adsorbent. *Polymers* **2022**, *14* (22), 4854.
- [2] Zhai, W.; He, J.; Han, P.; Zeng, M.; Gao, X.; He, Q., Adsorption mechanism for tetracycline onto magnetic Fe<sub>3</sub>O<sub>4</sub> nanoparticles: Adsorption isotherm and dynamic behavior, location of adsorption sites and interaction bonds. *Vacuum* **2022**, *195*, 110634.
- [3] Huízar-Félix, A. M.; Aguilar-Flores, C.; Martínez-de-la Cruz, A.; Barandiarán, J. M.; Sepúlveda-Guzmán, S.; Cruz-Silva, R., Removal of tetracycline pollutants by adsorption and magnetic separation using reduced graphene oxide decorated with  $\alpha$ -Fe<sub>2</sub>O<sub>3</sub> nanoparticles. *Nanomaterials* **2019**, *9* (3), 313.
- [4] Erdem, S.; Öztekin, M.; Sağ Açıknel, Y., Investigation of tetracycline removal from aqueous solutions using halloysite/chitosan nanocomposites and halloysite nanotubes/alginate hydrogel beads. *Environ. Nanotechnol. Monitor. Manage.* **2021**, *16*, 100576.
- [5] Ranjbari, S.; Tanhaei, B.; Ayati, A.; Khadempir, S.; Sillanpää, M., Efficient tetracycline adsorptive removal using tricaprilmethylammonium chloride conjugated chitosan hydrogel beads: Mechanism, kinetic, isotherms and thermodynamic study. *Int. J. Biol. Macromol.* **2020**, *155*, 421-429.
- [6] Nasiri, A.; Rajabi, S.; Amiri, A.; Fattahizade, M.; Hasani, O.; Lalehzari, A.; Hashemi, M., Adsorption of tetracycline using CuCoFe<sub>2</sub>O<sub>4</sub>@Chitosan as a new and green magnetic nanohybrid adsorbent from aqueous solutions: Isotherm, kinetic and thermodynamic study. *Arabian Journal of Chemistry* **2022**, *15* (8), 104014.
- [7] Chen, Y.; Wang, F.; Duan, L.; Yang, H.; Gao, J., Tetracycline adsorption onto rice husk ash, an agricultural waste: Its kinetic and thermodynamic studies. *J. Mol. Liq.* **2016**, *222*, 487-494.
- [8] Liang, Y.; Xu, X.; Yuan, F.; Lin, Y.; Xu, Y.; Zhang, Y.; Chen, D.; Wang, W.; Hu, H.; Ou, J. Z., Graphene oxide additive-driven widening of microporous biochar for promoting water pollutant capturing. *Carbon* **2023**, *205*, 40-53.
- [9] Zhang, Y.; Zhang, J.; Chen, K.; Shen, S.; Hu, H.; Chang, M.; Chen, D.; Wu, Y.; Yuan, H.; Wang, Y., Engineering banana-peel-derived biochar for the rapid adsorption of tetracycline based on double chemical activation. *Resour. Conserv. Recy.* **2023**, *190*, 106821.
- [10] Tahmasebpour, R.; Peighamardoust, S. J., Decontamination of tetracycline from aqueous solution using activated carbon/Fe<sub>3</sub>O<sub>4</sub>/ZIF-8 nanocomposite adsorbent. *Sep. Purif. Technol.* **2024**, *343*, 127188.

[11] Ouyang, E.; Wu, M.; He, W.; Liu, H.; Gui, M.; Yang, H., Chitin/calcite composite extracted from shell waste as a low-cost adsorbent for removal of tetracycline and ciprofloxacin: Effects and mechanisms. *Chemosphere* **2024**, *353*, 141503.
